# Supplementary material
Source: HighWire-hosted journal article supplement (http://www.cmaj.ca/highwire/filestream/58903/field_highwire_adjunct_files/0/angio-antoniou-1-at.pdf)
Supplement: angio-antoniou-1-at.pdf [file angio-antoniou-1-at.pdf]

**Appendix 1 (as supplied by the authors): ICD-9 and ICD-10 Codes For Outcome Ascertainment**

| Outcome                          | ICD-9 Code(s)                                  | ICD-10 Codes(s)                                                                                                                                                             |
|----------------------------------|------------------------------------------------|-----------------------------------------------------------------------------------------------------------------------------------------------------------------------------|
| Myocardial Infarction            | 410                                            | I21.0, I21.1, I21.2, I21.3, I21.4, I21.41, I21.42, I21.49, I21.9                                                                                                            |
| Stroke/transient ischemic attack | 434.0, 434.1, 434.9, 436, 435.8, 435.9, 431    | I63.0, I63.1, I63.2, I63.3, I63.4, I63.5, I63.8, I63.9, H34.1, G45.0, G45.1, G45.2, G45.3, G45.4, G45.8, G45.9, I62.9, I64, I61.1, I61.2, I61.3, I61.4, I61.5, I61.8, I61.9 |
| Heart failure                    | 425.0 – 425.9, 428.0, 428.1, 428.9, 518.4, 514 | I50.0, I50.1, I50.9, I25.5, J81                                                                                                                                             |
